# Supplementary material
Source: HighWire-hosted journal article supplement (https://www.annfammed.org/highwire/filestream/16376/field_highwire_adjunct_files/0/Fong_Supp_App.pdf)
Supplement: Fong_Supp_App.pdf [file Fong_Supp_App.pdf]

## Supplemental materials for

Fong J, Venables M, D'Souza D, Maskerine C. Patient communication preferences for prostate cancer screening discussions: a scoping review. *Ann Fam Med*. 2023;21(5):448-455.

## Supplemental Appendix

Keywords and MeSH headings used in four electronic databases (Medline, Embase, PsycINFO, CINAHL). Our search strategy outlined in each database.

Keywords: prostate cancer, prostate neoplasm, prostate tumor, prostate carcinoma, prostatic cancer, prostatic neoplasm, prostatic tumor, prostatic carcinoma, risk, and communication.

MeSH headings: Prostate Neoplasms, Prostate Cancer, Risk, Risk Reduction Behavior, Risk Assessment, Risk Management, Risk Factors, Risk Perception, Risk Attitude, Risk Taking, Risk Behavior, Patient Risk, Population Risk, Health Risk Behavior, Communication, and Interpersonal Communication.

## Search strategy – Medline

Ovid MEDLINE(R) ALL <1946 to March 4, 2022>

- 1 exp Prostatic Neoplasms/
- 2 ((prostate\* or prostatic\*) adj2 (cancer\* or neoplasm\* or tumor\* or carcinoma\*)).ti,ab,kf.
- 3 or/1-2

|    |                                                                                                            |
|----|------------------------------------------------------------------------------------------------------------|
| 4  | Risk Reduction Behavior/ or Risk Assessment/ or Risk Factors/ or Risk Management/ or Risk-Taking/ or Risk/ |
| 5  | risk*.ti,ab,kf.                                                                                            |
| 6  | or/4-5                                                                                                     |
| 7  | Communication/                                                                                             |
| 8  | communicat*.ti,ab,kf.                                                                                      |
| 9  | or/7-8                                                                                                     |
| 10 | 3 and 6 and 9                                                                                              |

## Search strategy – Embase

Embase <1974 to 2022 March 04>

|    |                                                                                                                                                           |
|----|-----------------------------------------------------------------------------------------------------------------------------------------------------------|
| 1  | exp prostate cancer/                                                                                                                                      |
| 2  | ((prostate* or prostatic*) adj2 (cancer* or neoplasm* or tumo?* or carcinoma*)).ti,ab,kw.                                                                 |
| 3  | 1 or 2                                                                                                                                                    |
| 4  | risk attitude/ or risk management/ or risk perception/ or risk/ or patient risk/ or risk reduction/ or population risk/ or risk factor/ or risk behavior/ |
| 5  | risk*.ti,ab,kw.                                                                                                                                           |
| 6  | 4 or 5                                                                                                                                                    |
| 7  | interpersonal communication/                                                                                                                              |
| 8  | communicat*.ti,ab,kw.                                                                                                                                     |
| 9  | 7 or 8                                                                                                                                                    |
| 10 | 3 and 6 and 9                                                                                                                                             |

## Search strategy – PsycINFO

APA PsycInfo <1806 to March 12, 2022>

- 1 exp Prostate/
- 2 exp Neoplasms/
- 3 ((prostate\* or prostatic\*) adj2 (cancer\* or neoplasm\* or tumor\* or carcinoma\*)).ti,ab,id.
- 4 1 and 2
- 5 3 or 4
- 6 Health Risk Behavior/ or Risk Factors/ or Risk Assessment/ or Risk Taking/ or Risk Management/
- 7 risk\*.ti,ab,id.
- 8 6 or 7
- 9 Communication/
- 10 communic\*.ti,ab,id.
- 11 9 or 10
- 12 5 and 8 and 11

## Search strategy – CINHAL

( MH ((prostate\* or prostatic\*) N2 (cancer\* or neoplasm\* or tumor\* or carcinoma\*)) OR TI ((prostate\* or prostatic\*) N2 (cancer\* or neoplasm\* or tumor\* or carcinoma\*)) OR AB ((prostate\* or prostatic\*) N2 (cancer\* or neoplasm\* or tumor\* or carcinoma\*)) ) AND ( MH ((risk\* or risk assessment or risk factors or risk management or risk reduction behavior?r)) OR TI ((risk\* or risk assessment or risk factors or risk management or risk reduction behavior?r)) OR AB ((risk\* or risk assessment or risk factors or risk management or risk reduction behavior?r)) ) AND ( MH (communicat\*) OR TI (communicat\*) OR AB (communicat\*) ) )

| Supplemental table 1. Grey Literature Checklist, adapted from 'Grey matters: a practical tool for searching health-related grey literature' <sup>16</sup>                  |                                                                                                                                                     |                  |
|----------------------------------------------------------------------------------------------------------------------------------------------------------------------------|-----------------------------------------------------------------------------------------------------------------------------------------------------|------------------|
| Sources                                                                                                                                                                    | Action<br>1 – Searched; results found<br>2 – Searched; nothing found<br>3 – Not searched; not relevant<br>4 – Results may be of peripheral interest | # search results |
| <b>Health technology assessments</b>                                                                                                                                       |                                                                                                                                                     |                  |
| <b>Canada</b>                                                                                                                                                              |                                                                                                                                                     |                  |
| The Alberta College of Family Physicians (ACFP). Tools for Practice                                                                                                        | 2 – Searched; nothing found                                                                                                                         | 0                |
| Alberta Health and Wellness. Decision Process provincial reviews – ongoing and complete                                                                                    | 2 – Searched; nothing found                                                                                                                         | 0                |
| Canadian Agency for Drugs and Technologies in Health (CADTH).                                                                                                              | 4 – Results may be of peripheral interest                                                                                                           | 0                |
| Drug Safety and Effectiveness Network (DSEN).                                                                                                                              | 3 – Not searched; not relevant                                                                                                                      | 0                |
| Health Quality Council of Alberta (HQCA). Completed Reviews                                                                                                                | 2 – Searched; nothing found                                                                                                                         | 0                |
| Health Quality Ontario (HQO). Health Technology Assessment                                                                                                                 | 4 – Results may be of peripheral interest                                                                                                           | 0                |
| The Hospital for Sick Children (SickKids). Technology Assessment at SickKids (TASK)                                                                                        | 3 – Not searched; not relevant                                                                                                                      | 0                |
| Institut national d'excellence en santé et en services sociaux (INESSS) [formerly AETMIS]. Publications                                                                    | 4 – Results may be of peripheral interest                                                                                                           | 0                |
| Institute of Health Economics (IHE). Publications                                                                                                                          | 2 – Searched; nothing found                                                                                                                         | 0                |
| Manitoba Centre for Health Policy (MCHP). Deliverables                                                                                                                     | 2 – Searched; nothing found                                                                                                                         | 0                |
| McGill University Health Centre (MUHC). Technology Assessment Unit Reports                                                                                                 | 2 – Searched; nothing found                                                                                                                         | 0                |
| NLCAHR : Newfoundland and Labrador Centre for Applied Health Research. Contextualized Health Research Synthesis Program (CHRSP) Completed CHRSP projects                   | 2 – Searched; nothing found                                                                                                                         | 0                |
| Ottawa Hospital Research Institute (OHRI). Knowledge Synthesis Group <a href="http://www.ohri.ca/ksgroup/publications.asp">http://www.ohri.ca/ksgroup/publications.asp</a> | 2 – Searched; nothing found                                                                                                                         | 0                |
| Programs for Assessment of Technology in Health (Canada). Reports (PATH)                                                                                                   | 2 – Searched; nothing found                                                                                                                         | 0                |
| Therapeutics Initiative. Therapeutics Letter                                                                                                                               | 3 – Not searched; not relevant                                                                                                                      | 0                |
| University of British Columbia. Centre for Health Services and Policy Research                                                                                             | 3 – Not searched; not relevant                                                                                                                      | 0                |
| <b>International</b>                                                                                                                                                       |                                                                                                                                                     |                  |
| INAHTA Secretariat. International Network of Agencies for Health Technology Assessment (INAHTA)                                                                            | 4 – Results may be of peripheral interest                                                                                                           | 0                |
| World Health Organization Regional Office for Europe. Health Evidence Network (WHO HEN)                                                                                    | 2 – Searched; nothing found                                                                                                                         | 0                |
| <b>Australia</b>                                                                                                                                                           |                                                                                                                                                     |                  |
| Australian Government. Department of Health and Ageing. Australia and New Zealand Horizon Scanning Network (ANZHSN)                                                        | 2 – Searched; nothing found                                                                                                                         | 0                |
| Australian Government Department of Health and Ageing. Medical Services Advisory Committee (MSAC). MSAC Applications                                                       | 2 – Searched; nothing found                                                                                                                         | 0                |
| Joanna Briggs Institute (JBI). The Joanna Briggs Institute EBP Database                                                                                                    | 4 – Results may be of peripheral interest                                                                                                           | 0                |
| Monash Health. Centre for Clinical Effectiveness (CCE). Centre for Clinical Effectiveness - Publications                                                                   | 2 – Searched; nothing found                                                                                                                         | 0                |
| National Prescribing Service. NPS RADAR                                                                                                                                    | 3 – Not searched; not relevant                                                                                                                      | 0                |
| Queensland Government (Australia). Health Technology Reference Group. Health Technologies Evaluated-Reports and Briefs (COAG Health Council)                               | 2 – Searched; nothing found                                                                                                                         | 0                |
| <b>Austria</b>                                                                                                                                                             |                                                                                                                                                     |                  |
| Institute of Technology Assessment (ITA). Projects                                                                                                                         | 2 – Searched; nothing found                                                                                                                         | 0                |
| Ludwig Boltzmann Institut für Health Technology Assessment (LBI). Ludwig Boltzmann Institute of Health Technology Assessment                                               | 2 – Searched; nothing found                                                                                                                         | 0                |
| <b>Belgium</b>                                                                                                                                                             |                                                                                                                                                     |                  |
| Kenniscentrum voor de Gezondheidszorg / Le Centre d'expertise des soins de santé. Belgian Health Care Knowledge Centre (KCE)                                               | 4 – Results may be of peripheral interest                                                                                                           | 0                |
| <b>Denmark</b>                                                                                                                                                             |                                                                                                                                                     |                  |
| Sundhedsstyrelsen. Danish Health and Medicines Authority (DHMA). Publications                                                                                              | 3 – Not searched; not relevant                                                                                                                      | 0                |
| <b>France</b>                                                                                                                                                              |                                                                                                                                                     |                  |
| Comité d'Evaluation de Diffusion des Innovations Technologiques (CEDIT). CEDIT Recommendations and Reports                                                                 | 3 – Not searched; not relevant                                                                                                                      | 0                |
| Haute Autorité de santé/ French National Authority for Health (HAS). Haute Autorité de santé                                                                               | 4 – Results may be of peripheral interest                                                                                                           | 0                |
| <b>Germany</b>                                                                                                                                                             |                                                                                                                                                     |                  |
| Deutsches Institut für Medizinische Dokumentation und Information. (DIMDI). German Institute of Medical Documentation and Information                                      | 2 – Searched; nothing found                                                                                                                         | 0                |
| <b>Ireland</b>                                                                                                                                                             |                                                                                                                                                     |                  |
| Health Information and Quality Authority. Health Technology Assessments                                                                                                    | 2 – Searched; nothing found                                                                                                                         | 0                |
| Health Service Executive. Irish Health Repository (Lenus)                                                                                                                  | 2 – Searched; nothing found                                                                                                                         | 0                |
| <b>The Netherlands</b>                                                                                                                                                     |                                                                                                                                                     |                  |
| De Gezondheidsraad (GR). Health Council of the Netherlands                                                                                                                 | 3 – Not searched; not relevant                                                                                                                      | 0                |
| Zorginstituut Nederland. National Health Care Institute Netherlands                                                                                                        | 2 – Searched; nothing found                                                                                                                         | 0                |
| <b>Norway</b>                                                                                                                                                              |                                                                                                                                                     |                  |
| Folkehelseinstituttet. Norwegian Institute of Public Health. Publications                                                                                                  | 2 – Searched; nothing found                                                                                                                         | 0                |

|                                                                                                                                                                                                                                                                                                                                                                                                                                                                                                                                                                                                                                                                                                                                                                                                                                                                                                                                                                                                                                                                                                                                                                                                                                                                                                                                                                                                                                                                                                                                                                                                                                                                                                                                                                                 |                                           |   |
|---------------------------------------------------------------------------------------------------------------------------------------------------------------------------------------------------------------------------------------------------------------------------------------------------------------------------------------------------------------------------------------------------------------------------------------------------------------------------------------------------------------------------------------------------------------------------------------------------------------------------------------------------------------------------------------------------------------------------------------------------------------------------------------------------------------------------------------------------------------------------------------------------------------------------------------------------------------------------------------------------------------------------------------------------------------------------------------------------------------------------------------------------------------------------------------------------------------------------------------------------------------------------------------------------------------------------------------------------------------------------------------------------------------------------------------------------------------------------------------------------------------------------------------------------------------------------------------------------------------------------------------------------------------------------------------------------------------------------------------------------------------------------------|-------------------------------------------|---|
| <p>Spain</p> <p><a href="#">Agencia de Evaluación de Tecnologías Sanitarias, Instituto de Salud "Carlos III"</a>. Institute of Health Carlos III</p> <p><a href="#">Agència de Qualitat i Avaluació Sanitàries de Catalunya (AQuAS)</a>. Agency for Health Quality and Assessment of Catalonia</p> <p>Sweden</p> <p><a href="#">Sahlgrenska Universitetssjukhuset. Sahlgrenska University Hospital</a>. Regional activity-based HTA</p> <p><a href="#">Swedish Council on Health Technology Assessment (SBU)</a>.</p> <p>UK</p> <p><a href="#">Healthcare Improvement Scotland</a>. Published Resources.</p> <p><a href="#">National Institute for Health and Care Excellence (NICE)</a>. NHS National Institute for Health and Care Excellence</p> <p><a href="#">National Institute for Health and Care Excellence (NICE)</a>. Advice List. Published evidence summaries</p> <p><a href="#">National Institute for Health Research. (NIHR)</a>. Innovation Observatory</p> <p><a href="#">NHS Purchasing and Supply Agency</a>. Centre for Evidence-based Purchasing (CEP)</p> <p><a href="#">NIHR Evaluation, Trials and Studies Coordinating Centre (NETSCC)</a>. Research Project</p> <p><a href="#">UK Department of Health (NHS)</a>. International Resource for Infection Control (iNRIC)</p> <p><a href="#">National Health Service UK (NHS)</a>. NHS England</p> <p>US</p> <p><a href="#">Agency for Healthcare Research and Quality (AHRQ)</a>.</p> <p><a href="#">Centers for Medicare &amp; Medicaid Services (CMS)</a>. Technology Assessments</p> <p><a href="#">ECRI Institute</a>.</p> <p><a href="#">Institute for Clinical and Economic Review (ICER)</a>.</p> <p><a href="#">Washington State Health Care Authority (HCA)</a>. Health Technology Review</p> | 3 – Not searched; not relevant            | 0 |
|                                                                                                                                                                                                                                                                                                                                                                                                                                                                                                                                                                                                                                                                                                                                                                                                                                                                                                                                                                                                                                                                                                                                                                                                                                                                                                                                                                                                                                                                                                                                                                                                                                                                                                                                                                                 | 3 – Not searched; not relevant            | 0 |
|                                                                                                                                                                                                                                                                                                                                                                                                                                                                                                                                                                                                                                                                                                                                                                                                                                                                                                                                                                                                                                                                                                                                                                                                                                                                                                                                                                                                                                                                                                                                                                                                                                                                                                                                                                                 | 2 – Searched; nothing found               | 0 |
|                                                                                                                                                                                                                                                                                                                                                                                                                                                                                                                                                                                                                                                                                                                                                                                                                                                                                                                                                                                                                                                                                                                                                                                                                                                                                                                                                                                                                                                                                                                                                                                                                                                                                                                                                                                 | 3 – Not searched; not relevant            | 0 |
|                                                                                                                                                                                                                                                                                                                                                                                                                                                                                                                                                                                                                                                                                                                                                                                                                                                                                                                                                                                                                                                                                                                                                                                                                                                                                                                                                                                                                                                                                                                                                                                                                                                                                                                                                                                 | 2 – Searched; nothing found               | 0 |
|                                                                                                                                                                                                                                                                                                                                                                                                                                                                                                                                                                                                                                                                                                                                                                                                                                                                                                                                                                                                                                                                                                                                                                                                                                                                                                                                                                                                                                                                                                                                                                                                                                                                                                                                                                                 | 2 – Searched; nothing found               | 0 |
|                                                                                                                                                                                                                                                                                                                                                                                                                                                                                                                                                                                                                                                                                                                                                                                                                                                                                                                                                                                                                                                                                                                                                                                                                                                                                                                                                                                                                                                                                                                                                                                                                                                                                                                                                                                 | 2 – Searched; nothing found               | 0 |
|                                                                                                                                                                                                                                                                                                                                                                                                                                                                                                                                                                                                                                                                                                                                                                                                                                                                                                                                                                                                                                                                                                                                                                                                                                                                                                                                                                                                                                                                                                                                                                                                                                                                                                                                                                                 | 2 – Searched; nothing found               | 0 |
|                                                                                                                                                                                                                                                                                                                                                                                                                                                                                                                                                                                                                                                                                                                                                                                                                                                                                                                                                                                                                                                                                                                                                                                                                                                                                                                                                                                                                                                                                                                                                                                                                                                                                                                                                                                 | 2 – Searched; nothing found               | 0 |
|                                                                                                                                                                                                                                                                                                                                                                                                                                                                                                                                                                                                                                                                                                                                                                                                                                                                                                                                                                                                                                                                                                                                                                                                                                                                                                                                                                                                                                                                                                                                                                                                                                                                                                                                                                                 | 2 – Searched; nothing found               | 0 |
|                                                                                                                                                                                                                                                                                                                                                                                                                                                                                                                                                                                                                                                                                                                                                                                                                                                                                                                                                                                                                                                                                                                                                                                                                                                                                                                                                                                                                                                                                                                                                                                                                                                                                                                                                                                 | 2 – Searched; nothing found               | 0 |
|                                                                                                                                                                                                                                                                                                                                                                                                                                                                                                                                                                                                                                                                                                                                                                                                                                                                                                                                                                                                                                                                                                                                                                                                                                                                                                                                                                                                                                                                                                                                                                                                                                                                                                                                                                                 | 3 – Not searched; not relevant            | 0 |
|                                                                                                                                                                                                                                                                                                                                                                                                                                                                                                                                                                                                                                                                                                                                                                                                                                                                                                                                                                                                                                                                                                                                                                                                                                                                                                                                                                                                                                                                                                                                                                                                                                                                                                                                                                                 | 3 – Not searched; not relevant            | 0 |
|                                                                                                                                                                                                                                                                                                                                                                                                                                                                                                                                                                                                                                                                                                                                                                                                                                                                                                                                                                                                                                                                                                                                                                                                                                                                                                                                                                                                                                                                                                                                                                                                                                                                                                                                                                                 | 4 – Results may be of peripheral interest | 0 |
|                                                                                                                                                                                                                                                                                                                                                                                                                                                                                                                                                                                                                                                                                                                                                                                                                                                                                                                                                                                                                                                                                                                                                                                                                                                                                                                                                                                                                                                                                                                                                                                                                                                                                                                                                                                 | 2 – Searched; nothing found               | 0 |
|                                                                                                                                                                                                                                                                                                                                                                                                                                                                                                                                                                                                                                                                                                                                                                                                                                                                                                                                                                                                                                                                                                                                                                                                                                                                                                                                                                                                                                                                                                                                                                                                                                                                                                                                                                                 | 3 – Not searched; not relevant            | 0 |
|                                                                                                                                                                                                                                                                                                                                                                                                                                                                                                                                                                                                                                                                                                                                                                                                                                                                                                                                                                                                                                                                                                                                                                                                                                                                                                                                                                                                                                                                                                                                                                                                                                                                                                                                                                                 | 2 – Searched; nothing found               | 0 |
|                                                                                                                                                                                                                                                                                                                                                                                                                                                                                                                                                                                                                                                                                                                                                                                                                                                                                                                                                                                                                                                                                                                                                                                                                                                                                                                                                                                                                                                                                                                                                                                                                                                                                                                                                                                 | 2 – Searched; nothing found               | 0 |
| <b>Health economics</b>                                                                                                                                                                                                                                                                                                                                                                                                                                                                                                                                                                                                                                                                                                                                                                                                                                                                                                                                                                                                                                                                                                                                                                                                                                                                                                                                                                                                                                                                                                                                                                                                                                                                                                                                                         |                                           |   |
| <p>Canada</p> <p><a href="#">Hospital for Sick Children [Toronto]</a>. Paediatric Economic Database Evaluation (PEDE)</p> <p><a href="#">Institute of Health Economics (IHE)</a>. Publications</p> <p><a href="#">McMaster University</a>. Centre for Health Economics and Policy Analysis. Publications database (CHEPA)</p> <p><a href="#">Public Health Agency of Canada (PHAC)</a>. Economic Burden of Illness in Canada</p> <p><a href="#">Toronto Health Economics and Technology Assessment Collaborative (THETA)</a>. THETA Publications and Knowledge Translation to Policy (KT) Activities</p> <p>International</p> <p><a href="#">Agency for Healthcare Research and Quality (AHRQ)</a>. National Quality Measures Clearinghouse</p> <p><a href="#">Australian Government Department of Health</a>. Pharmaceutical Benefits Scheme - Medicine Listing (PBS)</p> <p><a href="#">Federal Reserve Bank of St. Louis. Economic Research Division</a>. Ideas database (IDEAS)</p> <p><a href="#">International Society for Pharmacoeconomics and Outcomes Research (ISPOR)</a>. Value in Health: Journal of the International Society for Pharmacoeconomics and Outcomes Research</p> <p><a href="#">National Centre for Pharmacoeconomics. (NCPE)</a> Ireland. Pharmacoeconomic Evaluations</p> <p><a href="#">NHS Economic Evaluation Database (EED)</a>. economic evaluations of health care interventions</p> <p><a href="#">University of Aberdeen</a>. Health Economics Research Unit (HERU)</p>                                                                                                                                                                                                                                                                    | 3 – Not searched; not relevant            | 0 |
|                                                                                                                                                                                                                                                                                                                                                                                                                                                                                                                                                                                                                                                                                                                                                                                                                                                                                                                                                                                                                                                                                                                                                                                                                                                                                                                                                                                                                                                                                                                                                                                                                                                                                                                                                                                 | 3 – Not searched; not relevant            | 0 |
|                                                                                                                                                                                                                                                                                                                                                                                                                                                                                                                                                                                                                                                                                                                                                                                                                                                                                                                                                                                                                                                                                                                                                                                                                                                                                                                                                                                                                                                                                                                                                                                                                                                                                                                                                                                 | 3 – Not searched; not relevant            | 0 |
|                                                                                                                                                                                                                                                                                                                                                                                                                                                                                                                                                                                                                                                                                                                                                                                                                                                                                                                                                                                                                                                                                                                                                                                                                                                                                                                                                                                                                                                                                                                                                                                                                                                                                                                                                                                 | 3 – Not searched; not relevant            | 0 |
|                                                                                                                                                                                                                                                                                                                                                                                                                                                                                                                                                                                                                                                                                                                                                                                                                                                                                                                                                                                                                                                                                                                                                                                                                                                                                                                                                                                                                                                                                                                                                                                                                                                                                                                                                                                 | 3 – Not searched; not relevant            | 0 |
|                                                                                                                                                                                                                                                                                                                                                                                                                                                                                                                                                                                                                                                                                                                                                                                                                                                                                                                                                                                                                                                                                                                                                                                                                                                                                                                                                                                                                                                                                                                                                                                                                                                                                                                                                                                 | 3 – Not searched; not relevant            | 0 |
|                                                                                                                                                                                                                                                                                                                                                                                                                                                                                                                                                                                                                                                                                                                                                                                                                                                                                                                                                                                                                                                                                                                                                                                                                                                                                                                                                                                                                                                                                                                                                                                                                                                                                                                                                                                 | 3 – Not searched; not relevant            | 0 |
|                                                                                                                                                                                                                                                                                                                                                                                                                                                                                                                                                                                                                                                                                                                                                                                                                                                                                                                                                                                                                                                                                                                                                                                                                                                                                                                                                                                                                                                                                                                                                                                                                                                                                                                                                                                 | 3 – Not searched; not relevant            | 0 |
|                                                                                                                                                                                                                                                                                                                                                                                                                                                                                                                                                                                                                                                                                                                                                                                                                                                                                                                                                                                                                                                                                                                                                                                                                                                                                                                                                                                                                                                                                                                                                                                                                                                                                                                                                                                 | 3 – Not searched; not relevant            | 0 |
|                                                                                                                                                                                                                                                                                                                                                                                                                                                                                                                                                                                                                                                                                                                                                                                                                                                                                                                                                                                                                                                                                                                                                                                                                                                                                                                                                                                                                                                                                                                                                                                                                                                                                                                                                                                 | 3 – Not searched; not relevant            | 0 |
|                                                                                                                                                                                                                                                                                                                                                                                                                                                                                                                                                                                                                                                                                                                                                                                                                                                                                                                                                                                                                                                                                                                                                                                                                                                                                                                                                                                                                                                                                                                                                                                                                                                                                                                                                                                 | 3 – Not searched; not relevant            | 0 |
|                                                                                                                                                                                                                                                                                                                                                                                                                                                                                                                                                                                                                                                                                                                                                                                                                                                                                                                                                                                                                                                                                                                                                                                                                                                                                                                                                                                                                                                                                                                                                                                                                                                                                                                                                                                 | 3 – Not searched; not relevant            | 0 |
|                                                                                                                                                                                                                                                                                                                                                                                                                                                                                                                                                                                                                                                                                                                                                                                                                                                                                                                                                                                                                                                                                                                                                                                                                                                                                                                                                                                                                                                                                                                                                                                                                                                                                                                                                                                 | 3 – Not searched; not relevant            | 0 |
|                                                                                                                                                                                                                                                                                                                                                                                                                                                                                                                                                                                                                                                                                                                                                                                                                                                                                                                                                                                                                                                                                                                                                                                                                                                                                                                                                                                                                                                                                                                                                                                                                                                                                                                                                                                 | 3 – Not searched; not relevant            | 0 |
|                                                                                                                                                                                                                                                                                                                                                                                                                                                                                                                                                                                                                                                                                                                                                                                                                                                                                                                                                                                                                                                                                                                                                                                                                                                                                                                                                                                                                                                                                                                                                                                                                                                                                                                                                                                 | 3 – Not searched; not relevant            | 0 |
|                                                                                                                                                                                                                                                                                                                                                                                                                                                                                                                                                                                                                                                                                                                                                                                                                                                                                                                                                                                                                                                                                                                                                                                                                                                                                                                                                                                                                                                                                                                                                                                                                                                                                                                                                                                 | 3 – Not searched; not relevant            | 0 |
|                                                                                                                                                                                                                                                                                                                                                                                                                                                                                                                                                                                                                                                                                                                                                                                                                                                                                                                                                                                                                                                                                                                                                                                                                                                                                                                                                                                                                                                                                                                                                                                                                                                                                                                                                                                 | 3 – Not searched; not relevant            | 0 |
| <b>Clinical practice guidelines</b>                                                                                                                                                                                                                                                                                                                                                                                                                                                                                                                                                                                                                                                                                                                                                                                                                                                                                                                                                                                                                                                                                                                                                                                                                                                                                                                                                                                                                                                                                                                                                                                                                                                                                                                                             |                                           |   |
| <p>Canada</p> <p><a href="#">Alberta Medical Association</a>. Toward Optimized Practice (TOP)</p> <p><a href="#">British Columbia Ministry of Health</a>. BC Guidelines</p> <p><a href="#">Canadian Medical Association (CMA)</a>. CMA Infobase: Clinical Practice Guidelines</p> <p><a href="#">Canadian Partnership Against Cancer</a>. Cancer Guidelines Database</p> <p><a href="#">Canadian Standards Association (CSA)</a>. Occupational Health and Safety</p> <p><a href="#">The College of Physicians and Surgeons of Ontario (CPSO)</a>. CPGs &amp; Other Guidelines</p> <p><a href="#">Ontario Association of Medical Laboratories (OAML)</a></p> <p><a href="#">Public Health Agency of Canada (PHAC)</a>. Disease Prevention and Control Guidelines</p> <p><a href="#">Registered Nurses' Association of Ontario (RNAO)</a>. Nursing Best Practice Guidelines</p> <p><a href="#">University of Ottawa. School of Rehabilitation Science</a>. Evidence-based Practice</p> <p><a href="#">Winnipeg Regional Health Authority (WRHA)</a>. Evidence Informed Practice Tools</p> <p>International</p> <p><a href="#">Academy of Medicine of Malaysia</a>. Clinical Practice Guidelines</p> <p><a href="#">Aetna, Inc.</a> Clinical Policy Bulletins</p> <p><a href="#">American Association for Clinical Chemistry (AACC)</a>. Practice Guidelines</p> <p><a href="#">Best Practice Advocacy Centre New Zealand (bpacNZ)</a>. bpacNZ better medicine</p>                                                                                                                                                                                                                                                                                                                 | 2 – Searched; nothing found               | 0 |
|                                                                                                                                                                                                                                                                                                                                                                                                                                                                                                                                                                                                                                                                                                                                                                                                                                                                                                                                                                                                                                                                                                                                                                                                                                                                                                                                                                                                                                                                                                                                                                                                                                                                                                                                                                                 | 4 – Results may be of peripheral interest | 0 |
|                                                                                                                                                                                                                                                                                                                                                                                                                                                                                                                                                                                                                                                                                                                                                                                                                                                                                                                                                                                                                                                                                                                                                                                                                                                                                                                                                                                                                                                                                                                                                                                                                                                                                                                                                                                 | 2 – Searched; nothing found               | 0 |
|                                                                                                                                                                                                                                                                                                                                                                                                                                                                                                                                                                                                                                                                                                                                                                                                                                                                                                                                                                                                                                                                                                                                                                                                                                                                                                                                                                                                                                                                                                                                                                                                                                                                                                                                                                                 | 1 – Searched; results found               | 1 |
|                                                                                                                                                                                                                                                                                                                                                                                                                                                                                                                                                                                                                                                                                                                                                                                                                                                                                                                                                                                                                                                                                                                                                                                                                                                                                                                                                                                                                                                                                                                                                                                                                                                                                                                                                                                 | 2 – Searched; nothing found               | 0 |
|                                                                                                                                                                                                                                                                                                                                                                                                                                                                                                                                                                                                                                                                                                                                                                                                                                                                                                                                                                                                                                                                                                                                                                                                                                                                                                                                                                                                                                                                                                                                                                                                                                                                                                                                                                                 | 2 – Searched; nothing found               | 0 |
|                                                                                                                                                                                                                                                                                                                                                                                                                                                                                                                                                                                                                                                                                                                                                                                                                                                                                                                                                                                                                                                                                                                                                                                                                                                                                                                                                                                                                                                                                                                                                                                                                                                                                                                                                                                 | 3 – Not searched; not relevant            | 0 |
|                                                                                                                                                                                                                                                                                                                                                                                                                                                                                                                                                                                                                                                                                                                                                                                                                                                                                                                                                                                                                                                                                                                                                                                                                                                                                                                                                                                                                                                                                                                                                                                                                                                                                                                                                                                 | 2 – Searched; nothing found               | 0 |
|                                                                                                                                                                                                                                                                                                                                                                                                                                                                                                                                                                                                                                                                                                                                                                                                                                                                                                                                                                                                                                                                                                                                                                                                                                                                                                                                                                                                                                                                                                                                                                                                                                                                                                                                                                                 | 2 – Searched; nothing found               | 0 |
|                                                                                                                                                                                                                                                                                                                                                                                                                                                                                                                                                                                                                                                                                                                                                                                                                                                                                                                                                                                                                                                                                                                                                                                                                                                                                                                                                                                                                                                                                                                                                                                                                                                                                                                                                                                 | 2 – Searched; nothing found               | 0 |
|                                                                                                                                                                                                                                                                                                                                                                                                                                                                                                                                                                                                                                                                                                                                                                                                                                                                                                                                                                                                                                                                                                                                                                                                                                                                                                                                                                                                                                                                                                                                                                                                                                                                                                                                                                                 | 2 – Searched; nothing found               | 0 |
|                                                                                                                                                                                                                                                                                                                                                                                                                                                                                                                                                                                                                                                                                                                                                                                                                                                                                                                                                                                                                                                                                                                                                                                                                                                                                                                                                                                                                                                                                                                                                                                                                                                                                                                                                                                 | 2 – Searched; nothing found               | 0 |
|                                                                                                                                                                                                                                                                                                                                                                                                                                                                                                                                                                                                                                                                                                                                                                                                                                                                                                                                                                                                                                                                                                                                                                                                                                                                                                                                                                                                                                                                                                                                                                                                                                                                                                                                                                                 | 2 – Searched; nothing found               | 0 |
|                                                                                                                                                                                                                                                                                                                                                                                                                                                                                                                                                                                                                                                                                                                                                                                                                                                                                                                                                                                                                                                                                                                                                                                                                                                                                                                                                                                                                                                                                                                                                                                                                                                                                                                                                                                 | 2 – Searched; nothing found               | 0 |
|                                                                                                                                                                                                                                                                                                                                                                                                                                                                                                                                                                                                                                                                                                                                                                                                                                                                                                                                                                                                                                                                                                                                                                                                                                                                                                                                                                                                                                                                                                                                                                                                                                                                                                                                                                                 | 2 – Searched; nothing found               | 0 |
|                                                                                                                                                                                                                                                                                                                                                                                                                                                                                                                                                                                                                                                                                                                                                                                                                                                                                                                                                                                                                                                                                                                                                                                                                                                                                                                                                                                                                                                                                                                                                                                                                                                                                                                                                                                 | 3 – Not searched; not relevant            | 0 |
|                                                                                                                                                                                                                                                                                                                                                                                                                                                                                                                                                                                                                                                                                                                                                                                                                                                                                                                                                                                                                                                                                                                                                                                                                                                                                                                                                                                                                                                                                                                                                                                                                                                                                                                                                                                 | 4 – Results may be of peripheral interest | 0 |

|                                                                                                                                                                                                                                                                                                                                                                                                                                                                                                                                                                                                                                                                                                                                                                                                                                                                                                                        |                                                                                                                                                                                                                                                                                                                                                  |                                           |
|------------------------------------------------------------------------------------------------------------------------------------------------------------------------------------------------------------------------------------------------------------------------------------------------------------------------------------------------------------------------------------------------------------------------------------------------------------------------------------------------------------------------------------------------------------------------------------------------------------------------------------------------------------------------------------------------------------------------------------------------------------------------------------------------------------------------------------------------------------------------------------------------------------------------|--------------------------------------------------------------------------------------------------------------------------------------------------------------------------------------------------------------------------------------------------------------------------------------------------------------------------------------------------|-------------------------------------------|
| <a href="#">Centers for Disease Control and Prevention (CDC). Public Health Genomics Knowledge Base. Guideline Database</a><br><a href="#">The Regulation and Quality Improvement Authority (RQIA). Guidelines</a><br><a href="#">Haute Autorité de santé/ French National Authority for Health (HAS). Practice Guidelines</a><br><a href="#">Institute for Clinical Systems Improvement (ICSI). Guidelines</a><br><a href="#">ECRI Institute . ECRI Guidelines Trust (ECRI)</a><br><a href="#">National Health and Medical Research Council (NHMRC). Australia's Clinical Practice Guidelines Portal</a><br><a href="#">National Institute for Health and Care Excellence (NICE). NICE Guidelines</a><br><a href="#">Scottish Intercollegiate Guidelines Network (SIGN)</a>                                                                                                                                           | 4 – Results may be of peripheral interest<br>2 – Searched; nothing found<br>2 – Searched; nothing found                                                                               | 0<br>0<br>0<br>0<br>0<br>0<br>0           |
| <b>Drug and device regulatory approvals</b><br>Canada<br><a href="#">Health Canada. Drugs</a><br><a href="#">Health Canada. Devices</a><br>International<br><a href="#">Australian Government Department of Health. Pharmaceutical Benefits Scheme. Public Summary Documents by Product</a><br><a href="#">Australian Government Department of Health. Therapeutic Goods Administration. Australian Public Assessment Reports for Prescription Medicines (AusPARs)</a><br><a href="#">Department of Health (UK). Medicines and Healthcare Products Regulatory Agency (MHRA)</a><br><a href="#">European Medicines Agency (EMA).</a><br><a href="#">NHS Scotland. Scottish Medicines Consortium (SMC)</a><br><a href="#">Pharmaceutical Management Agency of New Zealand. PHARMAC</a><br><a href="#">US Food and Drug Administration (FDA). Devices</a><br><a href="#">US Food and Drug Administration (FDA). Drugs</a> | 3 – Not searched; not relevant<br>3 – Not searched; not relevant | 0<br>0<br>0<br>0<br>0<br>0<br>0<br>0<br>0 |
| <b>Advisories and warnings</b><br>Canada<br><a href="#">Canadian Pharmacists Association (CPhA). e-CPS</a><br><a href="#">Health Canada.</a><br>International<br><a href="#">Australian Government Department of Health. Therapeutic Goods Administration (TGA).</a><br><a href="#">European Medicines Agency (EMA).</a><br><a href="#">Medicines and Healthcare Products Regulatory Agency (MHRA). Drug Safety Update</a><br><a href="#">NHS England. Patient Safety Domain. Patient Safety Alerts (NRLS)</a><br><a href="#">New Zealand Medicines and Medical Devices Safety Authority.</a><br><a href="#">US Food and Drug Administration (FDA).</a>                                                                                                                                                                                                                                                                | 3 – Not searched; not relevant<br>3 – Not searched; not relevant                                                                     | 0<br>0<br>0<br>0<br>0<br>0<br>0           |
| <b>Drug class reviews</b><br><a href="#">Department of Veterans Affairs (US). Pharmacy Benefits Management Services. Drug Class Reviews</a><br><a href="#">Oregon Health &amp; Science University. Center for Evidence-based Policy. Drug Effectiveness Review Project (DERP)</a><br><a href="#">Saskatoon Health Region. RxFiles: Objective Comparisons for Optimal Drug Therapy</a>                                                                                                                                                                                                                                                                                                                                                                                                                                                                                                                                  | 3 – Not searched; not relevant<br>3 – Not searched; not relevant<br>3 – Not searched; not relevant                                                                                                                                                                                                                                               | 0<br>0<br>0                               |
| <b>Clinical trial registries</b><br><a href="#">Biomed Central. ISRCTN Registry</a><br><a href="#">Canadian Partnership Against Cancer Corporation. Canadian Cancer Trials</a><br><a href="#">National Institute of Medical Statistics, Indian Council of Medical Research. Clinical Trials Registry - India (CTRI)</a><br><a href="#">Thomson CenterWatch. CenterWatch Clinical Trials Listing Service</a><br><a href="#">US National Institutes of Health. ClinicalTrials.gov</a><br><a href="#">UK Department of Health. UK Clinical Research Network Study Portfolio (UKCRN)</a><br><a href="#">World Health Organization. International Clinical Trials Registry Platform Search Portal (ICTRP)</a>                                                                                                                                                                                                               | 2 – Searched; nothing found<br>2 – Searched; nothing found<br>2 – Searched; nothing found<br>2 – Searched; nothing found<br>2 – Searched; nothing found<br>4 – Results may be of peripheral interest<br>2 – Searched; nothing found<br>2 – Searched; nothing found                                                                               | 0<br>0<br>0<br>0<br>0<br>0<br>0           |
| <b>Canadian drug formularies</b><br><a href="#">Government of Canada. Prescription Drug Insurance Coverage</a>                                                                                                                                                                                                                                                                                                                                                                                                                                                                                                                                                                                                                                                                                                                                                                                                         | 3 – Not searched; not relevant                                                                                                                                                                                                                                                                                                                   | 0                                         |
| <b>Canadian physician fees schedules</b><br><a href="#">Alberta Health. Government of Alberta. Fees Information for Health Professionals</a><br><a href="#">Ministry of Health Services. Province of British Columbia. Medical Services Commission Payment Schedule</a><br><a href="#">Manitoba Health, Seniors and Active Living. Government of Manitoba. Physician's Manual</a><br><a href="#">New Brunswick Department of Health. Physician's Manual</a><br><a href="#">Department of Health and Community Services. Government of Newfoundland and Labrador. Information for Medical Care Plan (MCP) Providers</a><br><a href="#">College of Physicians and Surgeons of Nova Scotia. Information and Services for Physicians Licensed in Nova Scotia</a><br><a href="#">Ministry of Health and Long-Term Care. Ontario Health Insurance (OHIP) Schedule of Benefits and Fees</a>                                   | 3 – Not searched; not relevant<br>3 – Not searched; not relevant                                                                     | 0<br>0<br>0<br>0<br>0<br>0<br>0           |

|                                                                                                                                |                                           |   |
|--------------------------------------------------------------------------------------------------------------------------------|-------------------------------------------|---|
| <a href="#">Régie de l'assurance maladie du Québec. Physician's Manual – Fee for service</a>                                   | 3 – Not searched; not relevant            | 0 |
| <a href="#">Ministry of Health, Government of Saskatchewan. Physician Payment Schedules</a>                                    | 3 – Not searched; not relevant            | 0 |
| <a href="#">Government of Yukon. Yukon Health and Social Services</a>                                                          | 3 – Not searched; not relevant            | 0 |
| <b>Databases (free)</b>                                                                                                        |                                           |   |
| <a href="#">Bandolier. Bandolier Knowledge</a>                                                                                 | 2 – Searched; nothing found               | 0 |
| <a href="#">Latin-American and Caribbean Center on Health Sciences Information (LILACS)</a>                                    | 2 – Searched; nothing found               | 0 |
| <a href="#">McMaster University, McMaster Health Forum. Health Systems Evidence</a>                                            | 2 – Searched; nothing found               | 0 |
| <a href="#">National Center for Biotechnology Information (NCBI). Bookshelf</a>                                                | 2 – Searched; nothing found               | 0 |
| <a href="#">National Institute for Health and Care Excellence (NICE). Evidence Search: Health and Social Care</a>              | 2 – Searched; nothing found               | 0 |
| <a href="#">TRIP Database (TRIP). Trip Database - Clinical Search Engine</a>                                                   | 1 – Searched; results found               | 1 |
| <a href="#">University of York (CRD). Centre for Reviews and Dissemination</a>                                                 | 2 – Searched; nothing found               | 0 |
| <a href="#">University of York. PROSPERO: International prospective register of systematic reviews</a>                         | 2 – Searched; nothing found               | 0 |
| <a href="#">US National Library of Medicine (NLM). PubMed.</a>                                                                 | 1 – Searched; results found               | 2 |
| <a href="#">US National Library of Medicine &amp; National Institutes of Health (NIH). PubMed Central</a>                      | 1 – Searched; results found               | 1 |
| <b>Databases (subscription-based)</b>                                                                                          |                                           |   |
| <a href="#">Wiley InterScience. Cochrane Library</a>                                                                           | 1 – Searched; results found               | 1 |
| <a href="#">UpToDate. UpToDate.com</a>                                                                                         | 4 – Results may be of peripheral interest | 0 |
| <a href="#">Synergus. HTA Update</a>                                                                                           | 4 – Results may be of peripheral interest | 0 |
| <b>Health statistics</b>                                                                                                       |                                           |   |
| <b>Canada</b>                                                                                                                  |                                           |   |
| <a href="#">Canadian Institute for Health Information (CIHI). Quick Stats</a>                                                  | 3 – Not searched; not relevant            | 0 |
| <a href="#">Health Canada. Health Canada: Advanced Search</a>                                                                  | 3 – Not searched; not relevant            | 0 |
| <a href="#">IQVIA.</a>                                                                                                         | 3 – Not searched; not relevant            | 0 |
| <a href="#">Institute for Clinical Evaluative Sciences (ICES). Publications</a>                                                | 3 – Not searched; not relevant            | 0 |
| <a href="#">Institute of Health Economics (IHE). Database of Online Health Statistics</a>                                      | 3 – Not searched; not relevant            | 0 |
| <a href="#">New Brunswick Ministry of Health, Office of the Chief Medical Officer of Health. Epidemiology and Surveillance</a> | 3 – Not searched; not relevant            | 0 |
| <a href="#">Public Health Agency of Canada (PHAC).</a>                                                                         | 3 – Not searched; not relevant            | 0 |
| <a href="#">Statistics Canada.</a>                                                                                             | 3 – Not searched; not relevant            | 0 |
| <b>US</b>                                                                                                                      |                                           |   |
| <a href="#">Centers for Disease Control and Prevention (CDC)</a>                                                               | 3 – Not searched; not relevant            | 0 |
| <a href="#">National Cancer Institute. Surveillance, Epidemiology, and End Results Program (SEER)</a>                          | 2 – Searched; nothing found               | 0 |
| <b>International</b>                                                                                                           |                                           |   |
| <a href="#">Organisation for Economic Co-operation and Development (OECD).</a>                                                 | 3 – Not searched; not relevant            | 0 |
| <a href="#">World Health Organization (WHO). Global Health Observatory (GHO)</a>                                               | 3 – Not searched; not relevant            | 0 |
| <b>Internet search engines</b>                                                                                                 |                                           |   |
| <b>Search engines</b>                                                                                                          |                                           |   |
| <a href="#">Google</a>                                                                                                         | 1 – Searched; results found               | 2 |
| <a href="#">Google Scholar.</a>                                                                                                | 1 – Searched; results found               | 5 |
| <a href="#">Canadian Medical Association (CMA). Affiliated, Associated Societies and Observer Organizations</a>                | 2 – Searched; nothing found               | 0 |
| <b>Open access journals</b>                                                                                                    |                                           |   |
| <a href="#">Lund University Libraries. Directory of Open Access Journals (DOAJ)</a>                                            | 2 – Searched; nothing found               | 0 |
| <b>Miscellaneous</b>                                                                                                           |                                           |   |
| <b>Behavior change</b>                                                                                                         |                                           |   |
| <a href="#">Canadian Agency for Drugs and Technologies in Health (CADTH). Rx for Change</a>                                    | 2 – Searched; nothing found               | 0 |
| <b>Natural medicine and environmental health</b>                                                                               |                                           |   |
| <a href="#">United States Environmental Protection Agency (EPA). Health &amp; Environmental Research Online (HERO)</a>         | 3 – Not searched; not relevant            | 0 |
| <a href="#">Alternative Medicine Foundation. HerbMed®</a>                                                                      | 3 – Not searched; not relevant            | 0 |
| <a href="#">Memorial Sloan-Kettering Cancer Center. About Herbs</a>                                                            | 3 – Not searched; not relevant            | 0 |
| <b>Dentistry</b>                                                                                                               |                                           |   |
| <a href="#">Aetna Inc. Aetna Dental Clinical Policy Bulletins</a>                                                              | 3 – Not searched; not relevant            | 0 |
| <a href="#">ADA. Center for Evidence-Based Dentistry. Evidence Database</a>                                                    | 3 – Not searched; not relevant            | 0 |
| <b>Diagnostic tests</b>                                                                                                        |                                           |   |
| <a href="#">American Association for Clinical Chemistry (AACC). Practice Guidelines</a>                                        | 3 – Not searched; not relevant            | 0 |
| <a href="#">Centers for Disease Control and Prevention (CDC). Public Health Genomics Knowledge Base. Guideline Database</a>    | 3 – Not searched; not relevant            | 0 |
| <a href="#">Ontario Association of Medical Laboratories (OAML). Guidelines</a>                                                 | 3 – Not searched; not relevant            | 0 |

|                              |                                                                                                                         |                                |   |
|------------------------------|-------------------------------------------------------------------------------------------------------------------------|--------------------------------|---|
| Mental health                | <a href="#">Substance Abuse &amp; Mental Services Administration</a> . Evidence-Based Practices Resource Center (NREPP) | 3 – Not searched; not relevant | 0 |
|                              |                                                                                                                         |                                |   |
| Nursing                      | <a href="#">Canadian Nurses Association (CNA)</a> . Download/Buy                                                        | 3 – Not searched; not relevant | 0 |
|                              | <a href="#">Registered Nurses' Association of Ontario (RNAO)</a> . Publications & Resources                             | 2 – Searched; nothing found    | 0 |
| Physiotherapy/rehabilitation |                                                                                                                         |                                |   |
|                              | <a href="#">Centre of Evidence-Based Physiotherapy (CEBP)</a> . Physiotherapy Evidence Database: PEDro                  | 3 – Not searched; not relevant | 0 |
|                              | <a href="#">National Rehabilitation Information Center (NARIC)</a> . REHABDATA database                                 | 3 – Not searched; not relevant | 0 |
|                              | <a href="#">University of Ottawa. School of Rehabilitation Sciences</a> . Evidence-based Practice                       | 3 – Not searched; not relevant | 0 |
|                              | <a href="#">University of Queensland</a> . OTseeker                                                                     | 3 – Not searched; not relevant | 0 |



Supplemental Table 2. Codes (white highlight) were first sorted into generally positive or generally negative comments (light blue highlight), then grouped to form descriptive themes (grey highlights).

| Themes                                                           |
|------------------------------------------------------------------|
| Factors facilitating men having successful risk communication    |
| How information is presented                                     |
| Collects information from multiple sources                       |
| Receives enough information                                      |
| Understands physician                                            |
| Interpersonal factors                                            |
| Feels respected                                                  |
| Relates to physician                                             |
| Spends time with physician                                       |
| Trusts physician                                                 |
| Factors inhibiting men from having successful risk communication |
| How information is presented                                     |
| Doesn't understand physician                                     |
| Not receiving enough information                                 |
| Screening never brought up by physician                          |
| Interpersonal factors                                            |
| Distrusts physician                                              |
| Feels depersonalized                                             |
| Feels rushed                                                     |
| Perceived racism                                                 |
| Passivity                                                        |
| Apathy                                                           |
| Credulity                                                        |
| Fears diagnosis of cancer                                        |
| Submissive tendency                                              |
| Preconceived opinion and cognitive bias                          |
| Already decided to have PSA test                                 |
| Availability heuristic                                           |
| Belief that screening is the right thing to do                   |
| Distrusts science or statistics                                  |

Themes

Threats to masculinity



Supplemental Table 3. Analytical themes (grey highlight) adapted from codes and descriptive themes in Supplemental Table 2 to address the research question.

**Themes**

Other factors precluding risk discussions

- Already decided to pursue screening
- Being passive during interactions with physicians
- Perceived threats to well being

What men dislike when having risk discussions

- Doesn't trust medical professionals
- Being treated poorly
- Little or no information is provided
- The physician uses jargon or is vague

What men prefer when having risk discussions

- A trusting and respectful relationship exists with the physician
- Balanced and thorough information is provided
- Spending enough time with the physician
- The physician uses plain language

Note: Themes under “what men dislike when having risk discussions” were juxtaposed with themes under “What men prefer when having risk discussions” in the result, for a total of 4 main themes. Themes under “other factors precluding risk discussions” were considered ‘emergent’ as resulted unexpectedly from the initial coding phase. We consider these themes as supplementary answers to the research question and were of interest to report.

Supplemental Table 4. Characteristics of included studies.

| Study                 | Country | Information sources         | Sample size | Age range | Ethnicities represented                                                                             | Education                                                     | SES                                                                                                        |
|-----------------------|---------|-----------------------------|-------------|-----------|-----------------------------------------------------------------------------------------------------|---------------------------------------------------------------|------------------------------------------------------------------------------------------------------------|
| Allen et al., 2007    | U.S.A.  | Focus groups;<br>Interviews | 17          | 30 – 79   | Black                                                                                               | College or University;<br>Secondary school                    | <u>Annual household income.</u><br><\$45k: 66%<br>>\$45k: 33%                                              |
| Archer & Kayter, 2006 | U.K     | Interviews                  | 7           | 50 – 69   | Not reported                                                                                        | Not reported                                                  | Not reported                                                                                               |
| Biddle et al., 2017   | U.S.A.  | Interviews                  | 13          | 50 – 79   | Black; White or<br>Caucasian                                                                        | Not reported                                                  | Not reported                                                                                               |
| Blocker et al., 2006  | U.S.A.  | Focus groups                | 14          | 30 – 69   | Black                                                                                               | College or University;<br>Secondary school                    | Not reported                                                                                               |
| Chapple et al., 2008  | U.K.    | Interviews                  | 20          | 40 – 79   | Black; White or<br>Caucasian                                                                        | Not reported                                                  | Not reported                                                                                               |
| Conde et al., 2011    | U.S.A.  | Focus groups                | 20          | 40 – 69   | Asian or Pacific<br>Islander                                                                        | College or University;<br>Secondary school;<br>Primary school | Not reported                                                                                               |
| Danan et al., 2021    | U.S.A.  | Focus groups                | 44          | 50 – 79   | Black; White or<br>Caucasian                                                                        | Not reported                                                  | Not reported                                                                                               |
| Dube et al., 2005     | U.S.A.  | Focus groups                | 53          | 20 – 79   | Black; Latine;<br>White or Caucasian                                                                | College or University;<br>Secondary school;<br>Primary school | <u>Annual household income.</u><br><\$10k: 28%<br>\$10-50k: 49%<br>>\$50k: 15%<br>Non-responders: 8%       |
| Evans et al., 2007    | U.K.    | Interviews                  | 24          | 40 – 79   | White or Caucasian                                                                                  | Not reported                                                  | Not reported                                                                                               |
| Farrell et al., 2002  | U.S.A.  | Interviews                  | 40          | 40 – 69   | Black; White or<br>Caucasian; Other:<br>Not mentioned<br>what “other”<br>races/ethnicities<br>were. | College or University;<br>Secondary school                    | <u>Annual household income.</u><br><\$30k: 20%<br>\$30-80k: 55%<br>>\$80k: 25%                             |
| Ferrante et al., 2011 | U.S.A.  | Interviews                  | 64          | 50 – 79   | Black; Latine; Asian<br>or Pacific Islander;<br>White or Caucasian                                  | College or University;<br>Secondary school                    | <u>Employment status.</u><br>Employed: 56.2%<br>Retired: 37.5%<br>Unemployed: 4.7%<br>Non-responders: 1.6% |
| Ford et al., 2006     | U.S.A.  | Focus groups                | 12          | 50 – 79   | Black                                                                                               | Not reported                                                  | Not reported                                                                                               |

|                       |           |                             |    |         |                              |                                                               |                                                                                                                                                                                                       |
|-----------------------|-----------|-----------------------------|----|---------|------------------------------|---------------------------------------------------------------|-------------------------------------------------------------------------------------------------------------------------------------------------------------------------------------------------------|
| Friedman et al., 2009 | U.S.A.    | Focus groups;<br>Interviews | 25 | 40 – 69 | Black                        | College or University;<br>Secondary school                    | Not reported                                                                                                                                                                                          |
| Friedman et al., 2009 | U.S.A.    | Focus groups;<br>Interviews | 25 | 40 – 59 | Black                        | College or University;<br>Secondary school;<br>Primary school | Not reported                                                                                                                                                                                          |
| Friedman et al., 2012 | U.S.A.    | Focus groups                | 43 | 20 – 79 | Black                        | College or University;<br>Secondary school;<br>Primary school | <u>Employment status.</u><br>Full-time: 46.5%<br>Part-time: 11.6%<br>Retired: 16.3%<br>Unemployed: 25.6%<br><br><u>Annual household income.</u><br><\$20k: 38.1%<br>\$20-100k: 54.8%<br>>\$100k: 7.1% |
| Gwede et al., 2015    | U.S.A.    | Interviews                  | 20 | 40 – 69 | Black; White or<br>Caucasian | College or University;<br>Secondary school                    | <u>Employment status.</u><br>Employed: 55%<br>Retired or other: 45%<br><br><u>Annual household income.</u><br>\$20-60k: 25%<br>>\$60k: 75%                                                            |
| Hill, 2012            | U.S.A.    | Interviews                  | 14 | 40 – 79 | Black                        | Not reported                                                  | Not reported                                                                                                                                                                                          |
| Hooper et al., 2018   | U.S.A.    | Interviews                  | 43 | 40 – 79 | Black                        | College or University;<br>Secondary school;<br>Primary school | <u>Income adequacy.</u><br>Not at all difficult: 23.3%<br>Not very difficult: 25.6%<br>Somewhat difficult: 44.2%<br>Very difficult: 7%                                                                |
| Ilic et al., 2005     | Australia | Focus groups                | 33 | 40 – 79 | Not reported                 | College or University;<br>Secondary school;<br>Primary school | Not reported                                                                                                                                                                                          |
| Jernigan et al., 2001 | U.S.A.    | Focus groups                | 26 | 50 – 79 | Black                        | Not reported                                                  | Not reported                                                                                                                                                                                          |
| Kaninjing, 2017       | Africa    | Focus groups                | 25 | 40 – 79 | Black                        | College or University;<br>Secondary school;<br>Primary school | <u>Employment status.</u><br>Employed: 48%<br>Retired: 40%<br>Unemployed: 12%<br><br><u>Annual household income.</u>                                                                                  |

|                                   |        |                                 |    |         |                                      |                                                               |                                                                                                                                                                                               |
|-----------------------------------|--------|---------------------------------|----|---------|--------------------------------------|---------------------------------------------------------------|-----------------------------------------------------------------------------------------------------------------------------------------------------------------------------------------------|
|                                   |        |                                 |    |         |                                      |                                                               | <50K CFA: 60%<br>50-150k CFA: 24%<br>>150k CFA: 8%<br>Non-responder: 8%                                                                                                                       |
| McFall et al., 2006               | U.S.A. | Focus groups                    | 48 | 40 – 79 | Black; Latine;<br>White or Caucasian | Not reported                                                  | Not reported                                                                                                                                                                                  |
| Odedina et al., 2004              | U.S.A. | Focus groups                    | 49 | 40 – 79 | Black                                | College or University;<br>Secondary school;<br>Primary school | Not reported                                                                                                                                                                                  |
| Oliver, 2007                      | U.S.A. | Interviews                      | 9  | 40 – 79 | Black                                | College or University;<br>Secondary school;<br>Primary school | <u>Employment status.</u><br>Employed: 67%<br>Retired: 22%<br>Disabled: 11%<br><br><u>Annual household income.</u><br><\$30K: 33%<br>>\$30k: 67%                                              |
| Rai et al., 2007                  | U.K.   | Interviews                      | 20 | 40 – 79 | White or Caucasian                   | Not reported                                                  | Not reported                                                                                                                                                                                  |
| Shungu & Sterba,<br>2021          | U.S.A. | Focus groups                    | 21 | 50 – 69 | Black                                | College or University;<br>Secondary school;<br>Primary school | Not reported                                                                                                                                                                                  |
| Sutkowi-Hemstreet et<br>al., 2015 | U.S.A. | Interviews                      | 13 | 50 – 69 | Black; White or<br>Caucasian         | College or University                                         | Not reported                                                                                                                                                                                  |
| Taitt, 2015                       | U.S.A  | Interviews                      | 13 | 40 – 79 | Black                                | College or University;<br>Secondary school                    | Not reported                                                                                                                                                                                  |
| Woods et al., 2004                | U.S.A. | Focus groups;<br>Key informants | 37 | 30 – 79 | Black                                | College or University;<br>Secondary school;<br>Primary school | <u>Employment status.</u><br>Employed: 46.6%<br>Retired: 18.9%<br>Unemployed: 11.5%<br>Other: 23%<br><br><u>Annual household income.</u><br><\$10K: 27.9%<br>\$10-70k: 56.6%<br>>\$70k: 15.5% |

SES = socioeconomic status.

## REFERENCES

1. Canadian Cancer Statistics Advisory Committee in collaboration with the Canadian Cancer Society, Statistics Canada and the Public Health Agency of Canada. *Canadian Cancer Statistics 2021*. Canadian Cancer Society; 2021. Accessed Sep 18, 2022. <https://cdn.cancer.ca/-/media/files/research/cancer-statistics/2021-statistics/2021-pdf-en-final.pdf>
2. Thompson IM, Chang SS, Cookson MS. Complications of Transrectal Ultrasound-Guided Prostate Biopsy. In: Jones JS, ed. *Prostate Cancer Diagnosis*. Humana Press; 2013:227-239. 10.1007/978-1-62703-188-2\_17
3. Pinsky PF, Prorok PC, Yu K, et al. Extended mortality results for prostate cancer screening in the PLCO trial with median follow-up of 15 years. *Cancer*. 2017;123(4):592-599. 10.1002/cncr.30474
4. Hugosson J, Roobol MJ, Månsson M, et al; ERSPC investigators. A 16-yr follow-up of the European randomized study of screening for prostate cancer. *Eur Urol*. 2019;76(1):43-51. 10.1016/j.eururo.2019.02.009
5. Rendon RA, Mason RJ, Marzouk K, et al. Canadian Urological Association recommendations on prostate cancer screening and early diagnosis. *Can Urol Assoc J*. 2017;11(10):298-309. 10.5489/cuaj.4888
6. Carter HB, Albertsen PC, Barry MJ, et al. Early detection of prostate cancer: AUA Guideline. *J Urol*. 2013;190(2):419-426. 10.1016/j.juro.2013.04.119
7. Grossman DC, Curry SJ, Owens DK, et al; US Preventive Services Task Force. Screening for prostate cancer: US Preventive Services Task Force recommendation statement. *JAMA*. 2018;319(18):1901-1913. 10.1001/jama.2018.3710.
8. Van Poppel H, Roobol MJ, Chapple CR, et al. Prostate-specific antigen testing as part of a risk-adapted early detection strategy for prostate cancer: European Association of Urology position and recommendations for 2021. *Eur Urol*. 2021;80(6):703-711. 10.1016/j.eururo.2021.07.024
9. Knight SJ. Decision making and prostate cancer screening. *Urol Clin North Am*. 2014;41(2):257-266. 10.1016/j.ucl.2014.01.008
10. Jemal A, Culp MB, Ma J, Islami F, Fedewa SA. Prostate cancer incidence 5 years after US Preventive Services Task Force recommendations against screening. *J Natl Cancer Inst*. 2021;113(1):64-71. 10.1093/jnci/djaa068
11. Lillard JW, Moses KA, Mahal BA, George DJ. Racial disparities in black men with prostate cancer: a literature review. *Cancer*. 2022;128(21): 3787–3795. 10.1002/cncr.34433
12. Smith ZL, Eggener SE, Murphy AB. African-American prostate cancer disparities. *Curr Urol Rep*. 2017;18(10):81. 10.1007/s11934-017-0724-5
13. Wu I, Modlin CS. Disparities in prostate cancer in African American men: what primary care physicians can do. *Cleve Clin J Med*. 2012;79(5):313-320. 10.3949/ccjm.79a.11001
14. Saab MM, Reidy M, Hegarty J, et al. Men's information-seeking behavior regarding cancer risk and screening: a meta-narrative systematic review. *Psychooncology*. 2018;27(2):410-419. 10.1002/pon.4506
15. Tricco AC, Lillie E, Zarin W, et al. PRISMA extension for scoping reviews (PRISMA-ScR): checklist and explanation. *Ann Intern Med*. 2018;169(7):467-473. 10.7326/M18-0850
16. CADTH Research Information Services. Grey matters: a practical tool for searching health-related grey literature. Published 2018. Accessed Sep 18, 2022. <https://www.cadth.ca/resources/finding-evidence>
17. Veritas Health Innovation. Covidence systematic review software. [www.covidence.org](http://www.covidence.org)



18. Critical Appraisal Skills Programme. CASP qualitative research checklist. Published 2018. Accessed Mar 12, 2022. <https://casp-uk.net/wp-content/uploads/2018/01/CASP-Qualitative-Checklist-2018.pdf>
19. Long HA, French DP, Brooks JM. Optimising the value of the critical appraisal skills programme (CASP) tool for quality appraisal in qualitative evidence synthesis. *Res Methods Med Health Sci*. 2020;1(1):31-42. 10.1177/2632084320947559
20. Thomas J, Harden A. Methods for the thematic synthesis of qualitative research in systematic reviews. *BMC Med Res Methodol*. 2008;8(1):45. 10.1186/1471-2288-8-45
21. QSR International Pty Ltd. NVivo. <https://www.qsrinternational.com/nvivo-qualitative-data-analysis-software/home>
22. Biddle C, Brasel A, Underwood W III, Orom H. Experiences of uncertainty in men with an elevated PSA. *Am J Mens Health*. 2017;11(1):24-34. 10.1177/1557988315584376
23. Chapple A, Ziebland S, Hewitson P, McPherson A. Why men in the United Kingdom still want the prostate specific antigen test. *Qual Health Res*. 2008;18(1):56-64. 10.1177/1049732307309000
24. Dubé CE, Fuller BK, Rosen RK, Fagan M, O'Donnell J. Men's experiences of physical exams and cancer screening tests: a qualitative study. *Prev Med*. 2005;40(6):628-635. 10.1016/j.ypmed.2004.10.021
25. Hooper GL, Allen RS, Payne-Foster P, Oliver JS. A qualitative study to determine barriers for prostate cancer screening in rural African-American men. *Urol Nurs*. 2018;37(6):285-291. 10.7257/1053-816X.2017.37.6.285
26. Woods VD, Montgomery SB, Belliard JC, Ramírez-Johnson J, Wilson CM. Culture, black men, and prostate cancer: what is reality? *Cancer Control*. 2004;11(6):388-396. 10.1177/107327480401100606
27. Rai T, Clements A, Bukach C, Shine B, Austoker J, Watson E. What influences men's decision to have a prostate-specific antigen test? A qualitative study. *Fam Pract*. 2007;24(4):365-371. 10.1093/fampra/cmm033
28. Danan ER, White KM, Wilt TJ, Partin MR. Reactions to recommendations and evidence about prostate cancer screening among White and Black male veterans. *Am J Mens Health*. 2021;15(3):15579883211022110. 10.1177/15579883211022110
29. Archer J, Hayter M. Screening men for prostate cancer in general practice: experiences of men receiving an equivocal PSA (prostate specific antigen) test result. *Prim Health Care Res Dev*. 2006;7(2):124-134. 10.1191/1463423606pc280oa
30. McFall SL, Hamm RM, Volk RJ. Exploring beliefs about prostate cancer and early detection in men and women of three ethnic groups. *Patient Educ Couns*. 2006;61(1):109-116. 10.1016/j.pec.2005.02.016
31. Taitt HE. *Prostate Cancer and Afro-Caribbean Men: Experiences, Perceptions, and Beliefs*. [PhD Thesis]. Walden University; 2015.
32. Evans R, Edwards AG, Elwyn G, et al. 'It's a maybe test': men's experiences of prostate specific antigen testing in primary care. *Br J Gen Pract*. 2007;57(537):303-10.
33. Ilic D, Risbridger GP, Green S. The informed man: attitudes and information needs on prostate cancer screening. *J Mens Health Gend*. 2005;2(4):414-420. 10.1016/j.jmhg.2005.10.006
34. Ford ME, Vernon SW, Havstad SL, Thomas SA, Davis SD. Factors influencing behavioral intention regarding prostate cancer screening among older African-American men. *J Natl Med Assoc*. 2006;98(4):505-514.
35. Allen JD, Kennedy M, Wilson-Glover A, Gilligan TD. African-American men's perceptions about prostate cancer: implications for designing educational interventions. *Soc Sci Med*. 2007;64(11):2189-2200. 10.1016/j.socscimed.2007.01.007

36. Hill KS. *An Exploratory Case Study of African American Men on the Decision Making of Prostate Cancer Screening*. [PhD Thesis]. University of Phoenix; 2012.
37. Conde FA, Landier W, Ishida D, Bell R, Cuaresma CF, Misola J. Barriers and facilitators of prostate cancer screening among Filipino men in Hawaii. *Oncol Nurs Forum*. 2011;38(2):227-233. 10.1188/11.ONF.227-233
38. Farrell MH, Murphy MA, Schneider CE. How underlying patient beliefs can affect physician-patient communication about prostate-specific antigen testing. *Eff Clin Pract*. 2002;5(3):120-129.
39. Gwede CK, Davis SN, Wilson S, et al. Perceptions of prostate cancer screening controversy and informed decision making: implications for development of a targeted decision aid for unaffected male first-degree relatives. *Am J Health Promot*. 2015;29(6):393-401. 10.4278/ajhp.130904-QUAL-463
40. Shungu N, Sterba KR. Barriers and facilitators to informed decision-making about prostate cancer screening among Black men. *J Am Board Fam Med*. 2021;34(5):925-936. 10.3122/jabfm.2021.05.210149
41. Odedina FT, Scrivens J, Emanuel A, LaRose-Pierre M, Brown J, Nash R. A focus group study of factors influencing African-American men's prostate cancer screening behavior. *J Natl Med Assoc*. 2004;96(6):780-788.
42. Ferrante JM, Shaw EK, Scott JG. Factors influencing men's decisions regarding prostate cancer screening: a qualitative study. *J Community Health*. 2011;36(5):839-844. 10.1007/s10900-011-9383-5
43. Sutkowi-Hemstreet A, Vu M, Harris R, Brewer NT, Dolor RJ, Sheridan SL. Adult patients' perspectives on the benefits and harms of overused screening tests: a qualitative study. *J Gen Intern Med*. 2015;30(11):1618-1626. 10.1007/s11606-015-3283-9
44. Friedman DB, Corwin SJ, Rose ID, Dominick GM. Prostate cancer communication strategies recommended by older African-American men in South Carolina: a qualitative analysis. *J Cancer Educ*. 2009;24(3):204-209. 10.1090/08858190902876536
44. Friedman DB, Corwin SJ, Dominick GM, Rose ID. African American men's understanding and perceptions about prostate cancer: why multiple dimensions of health literacy are important in cancer communication. *J Community Health*. 2009;34(5):449-460. 10.1007/s10900-009-9167-3
46. Friedman DB, Thomas TL, Owens OL, Hébert JR. It takes two to talk about prostate cancer: a qualitative assessment of African American men's and women's cancer communication practices and recommendations. *Am J Mens Health*. 2012;6(6):472-484. 10.1177/1557988312453478
47. Kaninjing ET. *Knowledge, Beliefs and Attitudes Towards Screening for Prostate Cancer Among Men in Bamenda, Cameroon*. [PhD Thesis]. Florida A&M University College of Pharmacy and Pharmaceutical Sciences; 2017.
48. Jernigan JC, Trauth JM, Neal-Ferguson D, Cartier-Ulrich C. Factors that influence cancer screening in older African American men and women: focus group findings. *Fam Community Health*. 2001;24(3):27-33. 10.1097/00003727-200110000-00005
49. Blocker DE, Romocki LS, Thomas KB, et al. Knowledge, beliefs and barriers associated with prostate cancer prevention and screening behaviors among African-American men. *J Natl Med Assoc*. 2006;98(8):1286-1295.
50. Oliver JS. Attitudes and beliefs about prostate cancer and screening among rural African American men. *J Cult Divers*. 2007;14(2):74-80.
51. Ridd M, Shaw A, Lewis G, Salisbury C. The patient-doctor relationship: a synthesis of the qualitative literature on patients' perspectives. *Br J Gen Pract*. 2009;59(561):e116-e133. 10.3399/bjgp09X420248

52. Vickers AJ, Edwards K, Cooperberg MR, Mushlin AI. A simple schema for informed decision making about prostate cancer screening. *Ann Intern Med.* 2014;161(6):441-442. 10.7326/M14-0151
53. Ivlev I, Jerabkova S, Mishra M, Cook LA, Eden KB. Prostate cancer screening patient decision aids: a systematic review and meta-analysis. *Am J Prev Med.* 2018;55(6):896-907. 10.1016/j.amepre.2018.06.016
54. Zipkin DA, Umscheid CA, Keating NL, et al. Evidence-based risk communication: a systematic review. *Ann Intern Med.* 2014;161(4):270-280. 10.7326/M14-0295
55. Deen D, Lu WH, Rothstein D, Santana L, Gold MR. Asking questions: the effect of a brief intervention in community health centers on patient activation. *Patient Educ Couns.* 2011;84(2):257-260. 10.1016/j.pec.2010.07.026
56. Wilkes MS, Day FC, Srinivasan M, et al. Pairing physician education with patient activation to improve shared decisions in prostate cancer screening: a cluster randomized controlled trial. *Ann Fam Med.* 2013;11(4):324-334. 10.1370/afm.1550
57. Légaré F, Stacey D, Pouliot S, et al. Interprofessionalism and shared decision-making in primary care: a stepwise approach towards a new model. *J Interprof Care.* 2011;25(1):18-25. 10.3109/13561820.2010.490502
58. Makarov DV, Feuer Z, Ciprut S, et al. Randomized trial of community health worker-led decision coaching to promote shared decision-making for prostate cancer screening among Black male patients and their providers. *Trials.* 2021;22(1):128. 10.1186/s13063-021-05064-4
59. Edwards AG, Naik G, Ahmed H, et al. Personalised risk communication for informed decision making about taking screening tests. *Cochrane Database Syst Rev.* 2013;2013(2):CD001865. 10.1002/14651858.CD001865.pub3
60. Fagerlin A, Zikmund-Fisher BJ, Ubel PA. Helping patients decide: ten steps to better risk communication. *J Natl Cancer Inst.* 2011;103(19):1436-1443. 10.1093/jnci/djr318
61. James LJ, Wong G, Craig JC, et al. Men's perspectives of prostate cancer screening: a systematic review of qualitative studies. *PLOS ONE.* 2017;12(11):e0188258. 10.1371/journal.pone.0188258
62. Roter DL, Hall JA. Physician gender and patient-centered communication: a critical review of empirical research. *Annu Rev Public Health.* 2004;25(1):497-519. 10.1146/annurev.publhealth.25.101802.123134
63. Cooper-Patrick L, Gallo JJ, Gonzales JJ, et al. Race, gender, and partnership in the patient-physician relationship. *JAMA.* 1999;282(6):583-589. 10.1001/jama.282.6.583
64. Bearman M, Dawson P. Qualitative synthesis and systematic review in health professions education. *Med Educ.* 2013;47(3):252-260. 10.1111/medu.12092
65. Ma SJ, Oladeru OT, Wang K, et al. Prostate cancer screening patterns among sexual and gender minority individuals. *Eur Urol.* 2021;79(5):588-592. 10.1016/j.eururo.2020.11.009
66. Wilcox Vanden Berg RN, Basourakos SP, Shoag J, Scherr D, Al Hussein Al Awamlh B. Prostate cancer screening for gay men in the United States. *Urology.* 2022;163:119-125. 10.1016/j.urology.2021.07.027
67. Zeeman L, Sherriff N, Browne K, et al; Health4LGBTI Network. A review of lesbian, gay, bisexual, trans and intersex (LGBTI) health and healthcare inequalities. *Eur J Public Health.* 2019;29(5):974-980. 10.1093/eurpub/cky226
68. Edwards A, Elwyn G, Hood K, et al. The development of COMRADE—a patient-based outcome measure to evaluate the effectiveness of risk communication and treatment decision making in consultations. *Patient Educ Couns.* 2003;50(3):311-322. 10.1016/S0738-3991(03)00055-7



Supplemental Table 5. Illustrative quotes from included studies.

| Theme                                                                            | Illustrative quotes                                                                                                                                                                                                                                                                                                                                                                                                                                                                                                                                                                                                                                                                                                         |
|----------------------------------------------------------------------------------|-----------------------------------------------------------------------------------------------------------------------------------------------------------------------------------------------------------------------------------------------------------------------------------------------------------------------------------------------------------------------------------------------------------------------------------------------------------------------------------------------------------------------------------------------------------------------------------------------------------------------------------------------------------------------------------------------------------------------------|
| <i>Men's communication preferences when discussing prostate cancer screening</i> |                                                                                                                                                                                                                                                                                                                                                                                                                                                                                                                                                                                                                                                                                                                             |
| Using everyday language                                                          | <i>When done well</i><br><p>"... he was very professional, and he had a way about him of explaining things in medical terms that was understandable to the average lay person."<sup>22</sup></p>                                                                                                                                                                                                                                                                                                                                                                                                                                                                                                                            |
|                                                                                  | <i>Where improvement is required</i><br><p>"Talking to the patient in the language the patient can understand ...that's the key ... if the patient doesn't understand what that means, he's going to get frightened."<sup>24</sup></p>                                                                                                                                                                                                                                                                                                                                                                                                                                                                                      |
| Quantity of information                                                          | <i>When done well</i><br><p>"... we talked it through, the pros, the cons, the complications, what would happen if the PSA test proved to be positive, how would I feel, how would I react ... the doctor discussed possible treatment ... and the subsequent consequences of the treatment, incontinence.." <sup>27</sup></p> <p>"... trying to find out just how much information and ... making sure the patient is getting the information they want ... Sometimes you're not even sure what the question is that you want to ask ... but there's something you're trying to get at."<sup>24</sup></p> <p>"... he was very clear on the pros and cons and [it was] very clear that it was my decision"<sup>23</sup></p> |
|                                                                                  | <i>Where improvement is required</i><br><p>"I know I've had it done, but there's never been much of an explanation."<sup>28</sup></p> <p>"The comments were just 'great'. Well, I don't know what 'great' is ... Does 'great' mean normal or ... super normal?"<sup>24</sup></p> <p>"... I don't recall them[doctors] saying 'oh when was the last time you were checked for prostate cancer?'"<sup>33</sup></p>                                                                                                                                                                                                                                                                                                            |

|                                            |                                                                                                                                                                                                                                                                                                                                                                                                                                                                                                                                                                                                                                                                                                                                                                                                                                                                                                                                                                                                                                                                                                                                                                                                                                                                                                                                                      |
|--------------------------------------------|------------------------------------------------------------------------------------------------------------------------------------------------------------------------------------------------------------------------------------------------------------------------------------------------------------------------------------------------------------------------------------------------------------------------------------------------------------------------------------------------------------------------------------------------------------------------------------------------------------------------------------------------------------------------------------------------------------------------------------------------------------------------------------------------------------------------------------------------------------------------------------------------------------------------------------------------------------------------------------------------------------------------------------------------------------------------------------------------------------------------------------------------------------------------------------------------------------------------------------------------------------------------------------------------------------------------------------------------------|
| <p>Spending enough time</p>                | <p><i>When done well</i></p> <p>"They gave me pictorials, all kinds of bar graphs, pie charts, with all statistical data ... it must have took them about two hours to go through all of this ..." <sup>35</sup></p> <p>"I find that a woman doctor takes more time with you than a man doctor. She will sit down with you ... and visit with you longer and be more tuned in ..." <sup>24</sup></p> <p>"When you find a doctor who takes the time to explain stuff, I have more respect for him ... Just the fact that he's explaining to me puts me at ease ..." <sup>26</sup></p> <p><i>Where improvement is required</i></p> <p>"... when I go to the doctor's office, he only has about 10 minutes, so if you don't put your thing on the table, he's not going to be thinking about it ..." <sup>31</sup></p>                                                                                                                                                                                                                                                                                                                                                                                                                                                                                                                                  |
| <p>A respectful and trust relationship</p> | <p><i>When done well</i></p> <p>"We voiced our concerns and he addressed the concerns, he didn't shoot them down or make us sound like we were stupid in asking those questions." <sup>22</sup></p> <p>"It would be interfering with a sacred relationship between a man and his doc ... I want to know that my doctor is thinking about me, not some other 100,000 guys." <sup>38</sup></p> <p><i>Where improvement is required</i></p> <p>"It's a male part that a woman doesn't have. So it's better male ..." <sup>37</sup></p> <p>"... get more doctors out there talking to their older Black male patients about what their options are and delivering the information they need so that they can make a choice ... And I think that, in turn, would bring down the death pattern from the mere fact that you offered intelligent Black men, which most of us are, damn it, a choice in choosing what they do for their health." <sup>40</sup></p> <p>"... a lot of Afro-American people are thinking that when you go to the doctor, they are thinking about sometimes they experiment on you. You know, from back in the days ... so they kinda cautious about that." <sup>40</sup></p> <p>"... if you got a 30-year-old doctor, what is he gonna to know? He's only gonna know what you tell him. Or whatever he reads." <sup>28</sup></p> |

| <i>Intrinsic factors hindering successful shared decision making</i> |                                                                                                                                                                                                                                                                                                                                                                                                                                                                                                                                                                                                                                                                                                                                                                                                            |
|----------------------------------------------------------------------|------------------------------------------------------------------------------------------------------------------------------------------------------------------------------------------------------------------------------------------------------------------------------------------------------------------------------------------------------------------------------------------------------------------------------------------------------------------------------------------------------------------------------------------------------------------------------------------------------------------------------------------------------------------------------------------------------------------------------------------------------------------------------------------------------------|
| Already deciding to pursue screening                                 | <p>"I honestly believe the knowing, and having the option of prevention, outweighs all the other risks ... risk doesn't matter, you gotta do the proper things for health ..."<sup>38</sup></p> <p>"I've also heard that prostate cancer ... it's one of the more curable cancers, so that's something that you might want to know ... to save your life ... I want to be here for other people, my grandchildren and my children ..."<sup>40</sup></p> <p>"my friends who had raised PSA levels ... all three of them ... had prostate cancer ... and so I wanted to get this out of the way ..."<sup>27</sup></p> <p>"... I like to do the analysis thing [prostate cancer risk calculation] ... I like to see results. But if I get a positive result, I'm not sure I'll do anything."<sup>38</sup></p> |
| Being passive during clinical interactions                           | <p>"I know my doctor very well. He's been treating me now since I left the army. He suggested a blood test, and I said fine. He didn't have to go into the details"<sup>32</sup></p> <p>"As long as they come back and say 'that a boy,' I feel pretty good about it"<sup>28</sup></p> <p>"I never talked to the doctor about it [decision]. I usually just do what he tells me to do. He's smarter than I am."<sup>30</sup></p> <p>"Most people don't question doctors, just culturally we don't. Especially blacks. And we weren't really allowed to question a white male ..."<sup>35</sup></p>                                                                                                                                                                                                         |
| Threats to wellbeing                                                 | <p>"You can have a perfectly good prostate and then for some reason you go have the test done, and then you end up not ... being able to free willy anymore. That's no good."<sup>28</sup></p> <p>"... men have been taught all their lives, especially African American, that you are strong. You do not whine or complain. You do not need to talk to anybody ..."<sup>44</sup></p> <p>"I've always been a great believer and I think most men are...if it ain't broke don't fix it."<sup>33</sup></p> <p>"For anyone said to have cancer, you know that he is a dead living corpse. That illness, they say no medication can cure. Whether it is prostate or any other type of cancer."<sup>46</sup></p>                                                                                                |

## REFERENCES

1. Canadian Cancer Statistics Advisory Committee in collaboration with the Canadian Cancer Society, Statistics Canada and the Public Health Agency of Canada. *Canadian Cancer Statistics 2021*. Canadian Cancer Society; 2021. Accessed Sept 18, 2022. <https://cdn.cancer.ca/-/media/files/research/cancer-statistics/2021-statistics/2021-pdf-en-final.pdf>
2. Thompson IM, Chang SS, Cookson MS. Complications of Transrectal Ultrasound-Guided Prostate Biopsy. In: Jones JS, ed. *Prostate Cancer Diagnosis*. Humana Press; 2013:227-239. 10.1007/978-1-62703-188-2\_17
3. Pinsky PF, Prorok PC, Yu K, et al. Extended mortality results for prostate cancer screening in the PLCO trial with median follow-up of 15 years. *Cancer*. 2017;123(4):592-599. 10.1002/cncr.30474
4. Hugosson J, Roobol MJ, Månsson M, et al; ERSPC investigators. A 16-yr follow-up of the European randomized study of screening for prostate cancer. *Eur Urol*. 2019;76(1):43-51. 10.1016/j.eururo.2019.02.009
5. Rendon RA, Mason RJ, Marzouk K, et al. Canadian Urological Association recommendations on prostate cancer screening and early diagnosis. *Can Urol Assoc J*. 2017;11(10):298-309. 10.5489/cuaj.4888
6. Carter HB, Albertsen PC, Barry MJ, et al. Early detection of prostate cancer: AUA Guideline. *J Urol*. 2013;190(2):419-426. 10.1016/j.juro.2013.04.119
7. Grossman DC, Curry SJ, Owens DK, et al; US Preventive Services Task Force. Screening for prostate cancer: US Preventive Services Task Force recommendation statement. *JAMA*. 2018;319(18):1901-1913. 10.1001/jama.2018.3710.
8. Van Poppel H, Roobol MJ, Chapple CR, et al. Prostate-specific antigen testing as part of a risk-adapted early detection strategy for prostate cancer: European Association of Urology position and recommendations for 2021. *Eur Urol*. 2021;80(6):703-711. 10.1016/j.eururo.2021.07.024
9. Knight SJ. Decision making and prostate cancer screening. *Urol Clin North Am*. 2014;41(2):257-266. 10.1016/j.ucl.2014.01.008
10. Jemal A, Culp MB, Ma J, Islami F, Fedewa SA. Prostate cancer incidence 5 years after US Preventive Services Task Force recommendations against screening. *J Natl Cancer Inst*. 2021;113(1):64-71. 10.1093/jnci/djaa068
11. Lillard JW, Moses KA, Mahal BA, George DJ. Racial disparities in black men with prostate cancer: a literature review. *Cancer*. 2022;128(21): 3787–3795. 10.1002/cncr.34433
12. Smith ZL, Eggner SE, Murphy AB. African-American prostate cancer disparities. *Curr Urol Rep*. 2017;18(10):81. 10.1007/s11934-017-0724-5
13. Wu I, Modlin CS. Disparities in prostate cancer in African American men: what primary care physicians can do. *Cleve Clin J Med*. 2012;79(5):313-320. 10.3949/ccjm.79a.11001



14. Saab MM, Reidy M, Hegarty J, et al. Men's information-seeking behavior regarding cancer risk and screening: a meta-narrative systematic review. *Psychooncology*. 2018;27(2):410-419. 10.1002/pon.4506
15. Tricco AC, Lillie E, Zarin W, et al. PRISMA extension for scoping reviews (PRISMA-ScR): checklist and explanation. *Ann Intern Med*. 2018;169(7):467-473. 10.7326/M18-0850
16. CADTH Research Information Services. Grey matters: a practical tool for searching health-related grey literature. Published 2018. Accessed Sep 18, 2022. <https://www.cadth.ca/resources/finding-evidence>
17. Veritas Health Innovation. Covidence systematic review software. [www.covidence.org](http://www.covidence.org)
18. Critical Appraisal Skills Programme. CASP qualitative research checklist. Published 2018. Accessed Mar 12, 2022. <https://casp-uk.net/wp-content/uploads/2018/01/CASP-Qualitative-Checklist-2018.pdf>
19. Long HA, French DP, Brooks JM. Optimising the value of the critical appraisal skills programme (CASP) tool for quality appraisal in qualitative evidence synthesis. *Res Methods Med Health Sci*. 2020;1(1):31-42. 10.1177/2632084320947559
20. Thomas J, Harden A. Methods for the thematic synthesis of qualitative research in systematic reviews. *BMC Med Res Methodol*. 2008;8(1):45. 10.1186/1471-2288-8-45
21. QSR International Pty Ltd. NVivo. <https://www.qsrinternational.com/nvivo-qualitative-data-analysis-software/home>
22. Biddle C, Brasel A, Underwood W III, Orom H. Experiences of uncertainty in men with an elevated PSA. *Am J Mens Health*. 2017;11(1):24-34. 10.1177/1557988315584376
23. Chapple A, Ziebland S, Hewitson P, McPherson A. Why men in the United Kingdom still want the prostate specific antigen test. *Qual Health Res*. 2008;18(1):56-64. 10.1177/1049732307309000
24. Dubé CE, Fuller BK, Rosen RK, Fagan M, O'Donnell J. Men's experiences of physical exams and cancer screening tests: a qualitative study. *Prev Med*. 2005;40(6):628-635. 10.1016/j.ypmed.2004.10.021
25. Hooper GL, Allen RS, Payne-Foster P, Oliver JS. A qualitative study to determine barriers for prostate cancer screening in rural African-American men. *Urol Nurs*. 2018;37(6):285-291. 10.7257/1053-816X.2017.37.6.285
26. Woods VD, Montgomery SB, Belliard JC, Ramírez-Johnson J, Wilson CM. Culture, black men, and prostate cancer: what is reality? *Cancer Control*. 2004;11(6):388-396. 10.1177/107327480401100606
27. Rai T, Clements A, Bukach C, Shine B, Austoker J, Watson E. What influences men's decision to have a prostate-specific antigen test? A qualitative study. *Fam Pract*. 2007;24(4):365-371. 10.1093/fampra/cmm033
28. Danan ER, White KM, Wilt TJ, Partin MR. Reactions to recommendations and evidence about prostate cancer screening among White and Black male veterans. *Am J Mens Health*. 2021;15(3):15579883211022110. 10.1177/15579883211022110

29. Archer J, Hayter M. Screening men for prostate cancer in general practice: experiences of men receiving an equivocal PSA (prostate specific antigen) test result. *Prim Health Care Res Dev*. 2006;7(2):124-134. 10.1191/1463423606pc280oa
30. McFall SL, Hamm RM, Volk RJ. Exploring beliefs about prostate cancer and early detection in men and women of three ethnic groups. *Patient Educ Couns*. 2006;61(1):109-116. 10.1016/j.pec.2005.02.016
31. Taitt HE. *Prostate Cancer and Afro-Caribbean Men: Experiences, Perceptions, and Beliefs*. [PhD Thesis]. Walden University; 2015.
32. Evans R, Edwards AG, Elwyn G, et al. 'It's a maybe test': men's experiences of prostate specific antigen testing in primary care. *Br J Gen Pract*. 2007;57(537):303-10.
33. Ilic D, Risbridger GP, Green S. The informed man: attitudes and information needs on prostate cancer screening. *J Mens Health Gend*. 2005;2(4):414-420. 10.1016/j.jmhg.2005.10.006
34. Ford ME, Vernon SW, Havstad SL, Thomas SA, Davis SD. Factors influencing behavioral intention regarding prostate cancer screening among older African-American men. *J Natl Med Assoc*. 2006;98(4):505-514.
35. Allen JD, Kennedy M, Wilson-Glover A, Gilligan TD. African-American men's perceptions about prostate cancer: implications for designing educational interventions. *Soc Sci Med*. 2007;64(11):2189-2200. 10.1016/j.socscimed.2007.01.007
36. Hill KS. *An Exploratory Case Study of African American Men on the Decision Making of Prostate Cancer Screening*. [PhD Thesis]. University of Phoenix; 2012.
37. Conde FA, Landier W, Ishida D, Bell R, Cuaresma CF, Misola J. Barriers and facilitators of prostate cancer screening among Filipino men in Hawaii. *Oncol Nurs Forum*. 2011;38(2):227-233. 10.1188/11.ONF.227-233
38. Farrell MH, Murphy MA, Schneider CE. How underlying patient beliefs can affect physician-patient communication about prostate-specific antigen testing. *Eff Clin Pract*. 2002;5(3):120-129.
39. Gwede CK, Davis SN, Wilson S, et al. Perceptions of prostate cancer screening controversy and informed decision making: implications for development of a targeted decision aid for unaffected male first-degree relatives. *Am J Health Promot*. 2015;29(6):393-401. 10.4278/ajhp.130904-QUAL-463
40. Shungu N, Sterba KR. Barriers and facilitators to informed decision-making about prostate cancer screening among Black men. *J Am Board Fam Med*. 2021;34(5):925-936. 10.3122/jabfm.2021.05.210149
41. Odedina FT, Scrivens J, Emanuel A, LaRose-Pierre M, Brown J, Nash R. A focus group study of factors influencing African-American men's prostate cancer screening behavior. *J Natl Med Assoc*. 2004;96(6):780-788.
42. Ferrante JM, Shaw EK, Scott JG. Factors influencing men's decisions regarding prostate cancer screening: a qualitative study. *J Community Health*. 2011;36(5):839-844. 10.1007/s10900-011-9383-5

43. Sutkowi-Hemstreet A, Vu M, Harris R, Brewer NT, Dolor RJ, Sheridan SL. Adult patients' perspectives on the benefits and harms of overused screening tests: a qualitative study. *J Gen Intern Med*. 2015;30(11):1618-1626. 10.1007/s11606-015-3283-9
44. Friedman DB, Corwin SJ, Rose ID, Dominick GM. Prostate cancer communication strategies recommended by older African-American men in South Carolina: a qualitative analysis. *J Cancer Educ*. 2009;24(3):204-9. 10.1080/08858190902876536
45. Friedman DB, Corwin SJ, Dominick GM, Rose ID. African American men's understanding and perceptions about prostate cancer: why multiple dimensions of health literacy are important in cancer communication. *J Community Health*. 2009;34(5):449-460. 10.1007/s10900-009-9167-3
46. Friedman DB, Thomas TL, Owens OL, Hébert JR. It takes two to talk about prostate cancer: a qualitative assessment of African American men's and women's cancer communication practices and recommendations. *Am J Mens Health*. 2012;6(6):472-484. 10.1177/1557988312453478
47. Kaninjing ET. *Knowledge, Beliefs and Attitudes Towards Screening for Prostate Cancer Among Men in Bamenda, Cameroon*. [PhD Thesis]. Florida A&M University College of Pharmacy and Pharmaceutical Sciences; 2017.
48. Jernigan JC, Trauth JM, Neal-Ferguson D, Cartier-Ulrich C. Factors that influence cancer screening in older African American men and women: focus group findings. *Fam Community Health*. 2001;24(3):27-33. 10.1097/00003727-200110000-00005
49. Blocker DE, Romocki LS, Thomas KB, et al. Knowledge, beliefs and barriers associated with prostate cancer prevention and screening behaviors among African-American men. *J Natl Med Assoc*. 2006;98(8):1286-1295.
50. Oliver JS. Attitudes and beliefs about prostate cancer and screening among rural African American men. *J Cult Divers*. 2007;14(2):74-80.
51. Ridd M, Shaw A, Lewis G, Salisbury C. The patient-doctor relationship: a synthesis of the qualitative literature on patients' perspectives. *Br J Gen Pract*. 2009;59(561):e116-e133. 10.3399/bjgp09X420248
52. Vickers AJ, Edwards K, Cooperberg MR, Mushlin AI. A simple schema for informed decision making about prostate cancer screening. *Ann Intern Med*. 2014;161(6):441-442. 10.7326/M14-0151
53. Ivlev I, Jerabkova S, Mishra M, Cook LA, Eden KB. Prostate cancer screening patient decision aids: a systematic review and meta-analysis. *Am J Prev Med*. 2018;55(6):896-907. 10.1016/j.amepre.2018.06.016
54. Zipkin DA, Umscheid CA, Keating NL, et al. Evidence-based risk communication: a systematic review. *Ann Intern Med*. 2014;161(4):270-280. 10.7326/M14-0295
55. Deen D, Lu WH, Rothstein D, Santana L, Gold MR. Asking questions: the effect of a brief intervention in community health centers on patient activation. *Patient Educ Couns*. 2011;84(2):257-260. 10.1016/j.pec.2010.07.026
56. Wilkes MS, Day FC, Srinivasan M, et al. Pairing physician education with patient activation to improve shared decisions in prostate cancer screening: a cluster randomized controlled trial. *Ann Fam Med*. 2013;11(4):324-334. 10.1370/afm.1550

57. Légaré F, Stacey D, Pouliot S, et al. Interprofessionalism and shared decision-making in primary care: a stepwise approach towards a new model. *J Interprof Care*. 2011;25(1):18-25. 10.3109/13561820.2010.490502
58. Makarov DV, Feuer Z, Ciprut S, et al. Randomized trial of community health worker-led decision coaching to promote shared decision-making for prostate cancer screening among Black male patients and their providers. *Trials*. 2021;22(1):128. 10.1186/s13063-021-05064-4
59. Edwards AG, Naik G, Ahmed H, et al. Personalised risk communication for informed decision making about taking screening tests. *Cochrane Database Syst Rev*. 2013;2013(2):CD001865. 10.1002/14651858.CD001865.pub3
60. Fagerlin A, Zikmund-Fisher BJ, Ubel PA. Helping patients decide: ten steps to better risk communication. *J Natl Cancer Inst*. 2011;103(19):1436-1443. 10.1093/jnci/djr318
61. James LJ, Wong G, Craig JC, et al. Men's perspectives of prostate cancer screening: a systematic review of qualitative studies. *PLOS ONE*. 2017;12(11):e0188258. 10.1371/journal.pone.0188258
62. Roter DL, Hall JA. Physician gender and patient-centered communication: a critical review of empirical research. *Annu Rev Public Health*. 2004;25(1):497-519. 10.1146/annurev.publhealth.25.101802.123134
63. Cooper-Patrick L, Gallo JJ, Gonzales JJ, et al. Race, gender, and partnership in the patient-physician relationship. *JAMA*. 1999;282(6):583-589. 10.1001/jama.282.6.583
64. Bearman M, Dawson P. Qualitative synthesis and systematic review in health professions education. *Med Educ*. 2013;47(3):252-260. 10.1111/medu.12092
65. Ma SJ, Oladeru OT, Wang K, et al. Prostate cancer screening patterns among sexual and gender minority individuals. *Eur Urol*. 2021;79(5):588-592. 10.1016/j.eururo.2020.11.009
66. Wilcox Vanden Berg RN, Basourakos SP, Shoag J, Scherr D, Al Hussein Al Awamlh B. Prostate cancer screening for gay men in the United States. *Urology*. 2022;163:119-125. 10.1016/j.urology.2021.07.027
67. Zeeman L, Sherriff N, Browne K, et al; Health4LGBTI Network. A review of lesbian, gay, bisexual, trans and intersex (LGBTI) health and healthcare inequalities. *Eur J Public Health*. 2019;29(5):974-980. 10.1093/eurpub/cky226
68. Edwards A, Elwyn G, Hood K, et al. The development of COMRADE—a patient-based outcome measure to evaluate the effectiveness of risk communication and treatment decision making in consultations. *Patient Educ Couns*. 2003;50(3):311-322. 10.1016/S0738-3991(03)00055-7
